# Supplementary material for: Assessment of the Susceptibility of Clinical Gram-Negative and Gram-Positive Bacterial Strains to Fosfomycin and Significance of This Antibiotic in Infection Treatment
Source: MDPI journal article supplement (doi:10.3390/pathogens11121441), 2022-11-30
Supplement: s1 [file s1]

Supplementary materials

# Susceptibility assessment of clinical gram-negative and gram-positive bacterial strains to fosfomycin and significance of this antibiotic in infection treatment

Beata Kowalska-Krochmal<sup>1\*</sup>, Beata Mączyńska<sup>1</sup>, Danuta Rurańska-Smutnicka<sup>1</sup>, Anna Secewicz<sup>1</sup>, Grzegorz Krochmal, Małgorzata Bartelak<sup>1</sup>, Aleksandra Górczyńska<sup>1</sup>, Klaudyna Laufer<sup>2</sup>, Krystyna Woronowicz<sup>3</sup>, Joanna Łubniewska<sup>4</sup>, Jolanta Łappo<sup>5</sup>, Magdalena Czwartos<sup>6</sup>, Ruth Dudek-Wicher<sup>1</sup>

- 1 Department of Pharmaceutical Microbiology and Parasitology, Faculty of Pharmacy, Medical University of Silesian Piasts in Wrocław, Borowska 211, 50-556 Wrocław, Poland
  - 2 Laboratory Diagnostics Department, Jan Mikulicz-Radecki University Teaching Hospital Borowska 213, 50-556 Wrocław, Poland
  - 3 Synevo, T. Marciniak Lower Silesian Specialized Hospital, Gen. A. E. Fieldorfa 2, 54-049 Wrocław
  - 4 Microbiological laboratory, Provincial Specialized Hospital in Legnica, Iwaszkiewicza 5, 59-220 Legnica
  - 5 Microbiological laboratory, A. Sokolowski Specialized Hospital in Walbrzych, Health dept. in Kłodzko; A. Sokolowskiego 4, 58-309 Walbrzych
  - 6 Bacteriology Laboratory, Provincial Specialized Hospital in Kłodzko, Szpitalna 1A, 57-300 Kłodzko
- \* Correspondence: : beakk103@gmail.com

**Citation:** Kowalska-Krochmal, B.; Mączyńska, B.; Rurańska-Smutnicka, D.; Secewicz, A.; Krochmal, G.; Bartelak, M.; Górczyńska, A.; Laufer, K.; Woronowicz, K.; Łubniewska, J.; et al. Assessment of the Susceptibility of Clinical Gram-Negative and Gram-Positive Bacterial Strains to Fosfomycin and Significance of This Antibiotic in Infection Treatment. *Pathogens* **2022**, *11*, 1441. <https://doi.org/10.3390/pathogens11121441>

Academic Editors: Andaleeb Sajid and Gunjan Arora

Received: 10 October 2022

Accepted: 29 November 2022

Published: 30 November 2022

**Publisher's Note:** MDPI stays neutral with regard to jurisdictional claims in published maps and institutional affiliations.

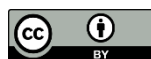

**Copyright:** © 2022 by the authors. Submitted for possible open access publication under the terms and conditions of the Creative Commons Attribution (CC BY) license (<https://creativecommons.org/licenses/by/4.0/>).

## Reading the MIC value in the reference method

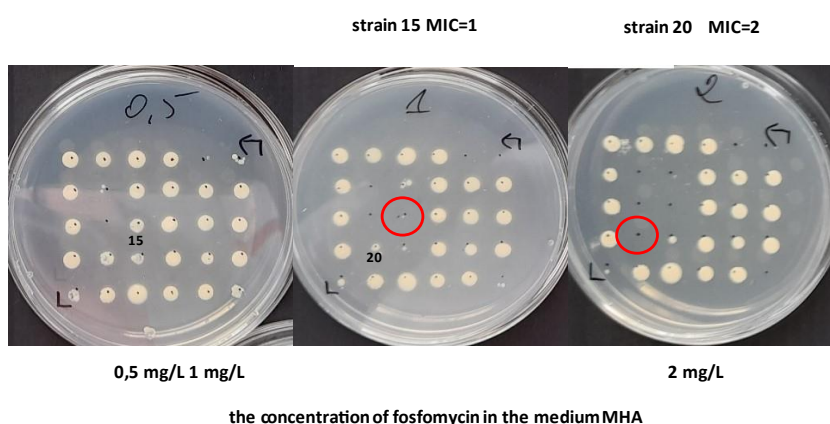

**Figure S1.** Reading the MIC value in the reference method

## Reading of MIC value in the reference method for *Proteus* strains

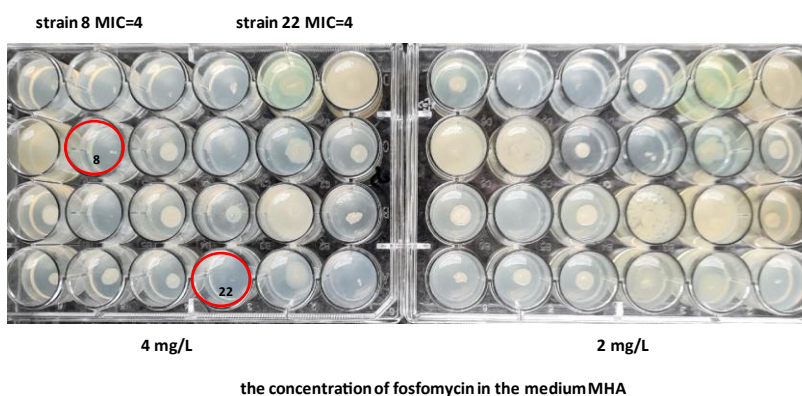

**Figure S2.** Reading the MIC value in the reference method for *Proteus* spp. strains**1. Statistical analysis explanation****1.1 Susceptibility Testing**

Statistical tests were performed using Scipy<sup>1</sup> library in Python programming language. The differences in susceptibility between the groups (Strains, Materials, Resistance Mechanism) were compared with *Chi-square test of independence of variables*<sup>2</sup>. The test results were considered significant for *p-value* lower than 0.05.

**1.2 Methodology Explanation**

For all of the groups compared (Strains, Materials, Resistance Mechanism) the same methodology was followed. Contingency tables were created for each relevant pair of the groups mentioned. An example contingency table<sup>3</sup> for *Klebsiella* spp. vs *E.coli* is shown in **Table S1**. Based on contingency tables, <sup>2</sup>(*Chi-square*) statistic was calculated.

**Table S1.** *Klebsiella* spp. vs *E.coli* Contingency Table

|                        | S   | R  |
|------------------------|-----|----|
| <b>Klebsiella</b> spp. | 165 | 85 |
| <b>E.coli</b>          | 170 | 11 |

**1.3 Results Explained**

For each of the groups analyzed (Strains, Materials, Resistance Mechanism), for each pair tested (Strain 1 vs Strain 2, Material 1 vs Material 2 etc.) the same Null Hypothesis can be formulated.

**H<sub>0</sub>**

Proportion of susceptible observations is independent of the Strain/Material/Mechanism type (on a pair level)

If *p-value* obtained is lower than our significance level = 0.05, then we reject the Null Hypothesis. The Alternative Hypothesis is as follows.

**H<sub>1</sub>**

Proportion of susceptible observations is different for different type of Strain/Material/Mechanism (on a pair level)

This means, for the pairs tested where our *p-value* is lower than 0.05, we might not rule out that there is significant difference in susceptibility between them.

<sup>1</sup> <https://scipy.org/citing-scipy/>

<sup>2</sup> [https://docs.scipy.org/doc/scipy/reference/generated/scipy.stats.chi2\\_contingency.html](https://docs.scipy.org/doc/scipy/reference/generated/scipy.stats.chi2_contingency.html)

<sup>3</sup> [https://sphweb.bumc.bu.edu/otlt/mph-modules/bs/bs704\\_hypothesistesting-chisquare/bs704\\_hypothesistesting-chisquare\\_print.html](https://sphweb.bumc.bu.edu/otlt/mph-modules/bs/bs704_hypothesistesting-chisquare/bs704_hypothesistesting-chisquare_print.html)
